# Supplementary material for: Gene flow in environmental Legionella pneumophila leads to genetic and pathogenic heterogeneity within a Legionnaires’ disease outbreak
Source: PubMed Central journal article supplement (PMC4256819; doi:10.1186/s13059-014-0504-1), 2014-11-03
Supplement: 13059_2014_504_MOESM1_ESM.pdf [file 13059_2014_504_MOESM1_ESM.pdf]

## Additional file 1

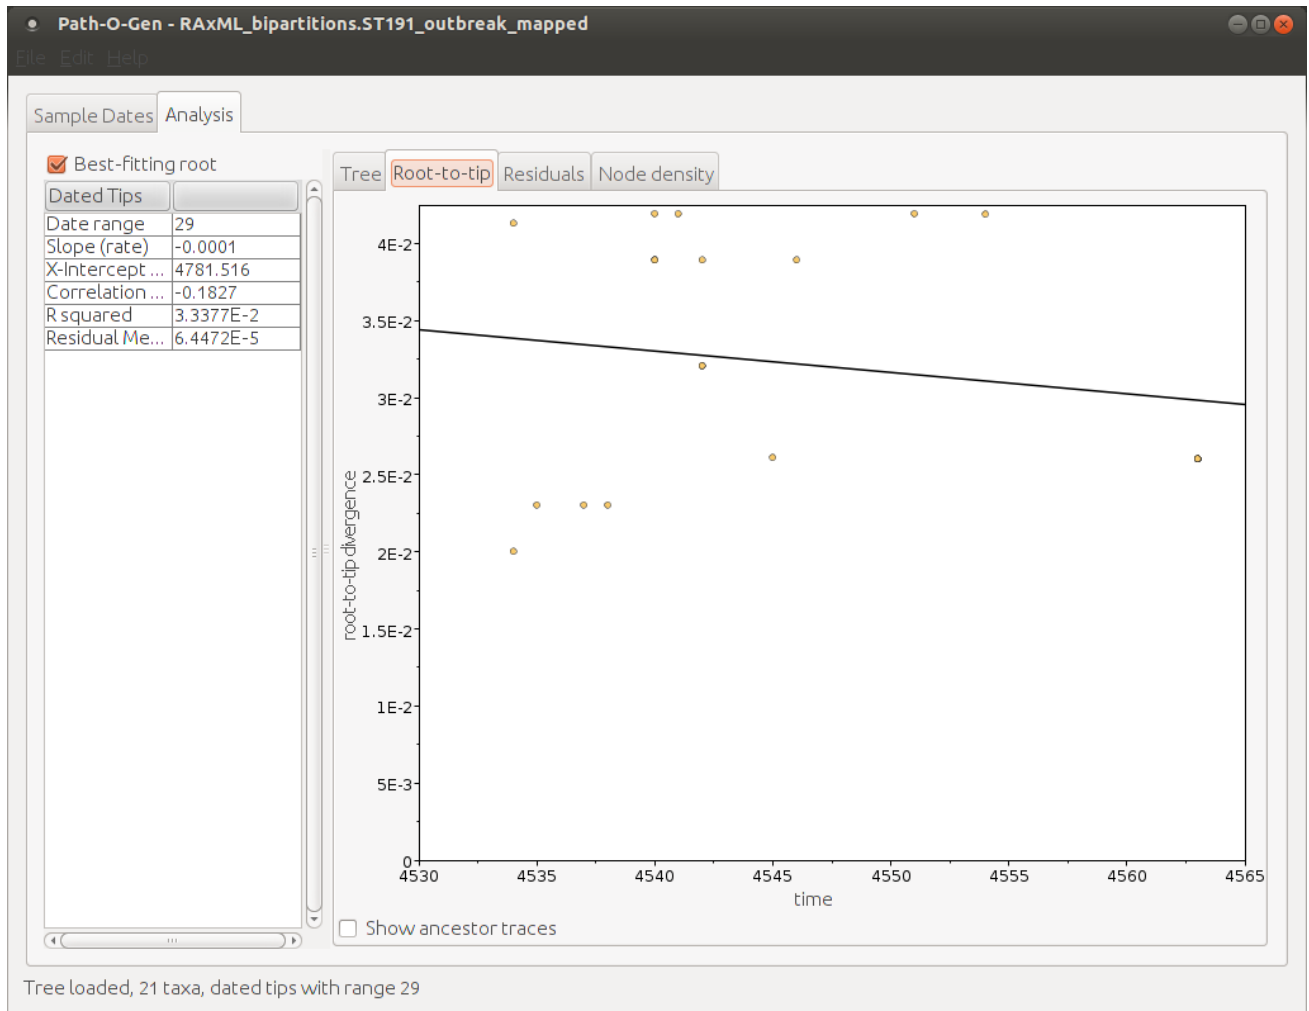

**Fig. S1** Output from Path-O-Gen representing a regression plot of root-tip distances against isolation time for outbreak isolates indicating a lack of temporal signal in the outbreak isolate sequences.

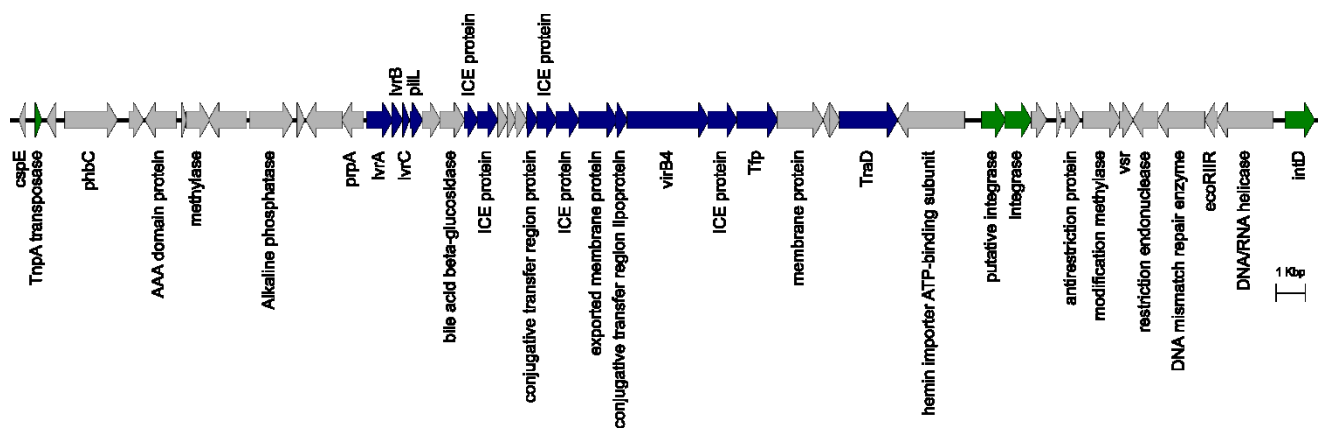

**Fig. S2** Schematic diagram of the novel T4SS present in isolates from clades B, and D. Arrows represent predicted CDSs identified using the prokka annotation pipeline, coloured as follows: blue, functional homology to previously identified T4SS proteins; green, homology to integrase family proteins. Unlabeled CDSs are predicted hypothetical proteins.

Table S1. Sequence assembly metrics for each *L. pneumophila* isolate sequenced

| <b>Isolate</b> | <b>N50</b> | <b>Number of contigs</b> | <b>Accession number</b> |
|----------------|------------|--------------------------|-------------------------|
| 12_4030        | 549491     | 29                       | ERS497042               |
| 12_4042        | 422611     | 32                       | ERS497043               |
| 12_4053        | 718197     | 34                       | ERS497044               |
| 12_4054        | 437914     | 32                       | ERS497045               |
| 12_4058        | 446387     | 35                       | ERS497046               |
| 12_4169        | 646293     | 26                       | ERS497048               |
| 12_4240        | 277640     | 32                       | ERS497049               |
| 12_4437        | 376046     | 31                       | ERS497051               |
| 12_4480        | 414859     | 36                       | ERS497052               |
| 12_4499        | 323143     | 36                       | ERS497053               |
| 12_4555        | 336849     | 27                       | ERS497054               |
| 12_4561        | 449291     | 33                       | ERS497055               |
| 12_4563        | 455502     | 32                       | ERS497056               |
| 12_4903        | 454289     | 32                       | ERS497057               |
| 12_5064        | 330767     | 27                       | ERS497059               |
| 12_5223        | 349034     | 28                       | ERS497060               |
| 12_5251        | 333356     | 29                       | ERS497061               |
| 12_5383        | 446507     | 35                       | ERS497063               |
| 12_5392        | 330608     | 29                       | ERS497062               |
| 12_5414        | 213979     | 38                       | ERS497064               |
| 12_5415        | 107106     | 74                       | ERS497065               |
| 12_3965        | 254145     | 42                       | ERS497041               |
| 12_4117        | 259870     | 51                       | ERS497047               |
| 12_4251        | 297133     | 47                       | ERS497050               |
| 12_4904        | 332618     | 46                       | ERS497058               |
| H064020049     | 81559      | 103                      | ERS497066               |
| H080160261     | 333314     | 28                       | ERS497067               |
| H080160262     | 268362     | 37                       | ERS497068               |
| H080160263     | 125881     | 82                       | ERS497069               |
| H092620872     | 213979     | 39                       | ERS497070               |

Table S2. Estimated time of most recent common ancestor for the outbreak ST191 isolates. A HKY model of nucleotide substitution was applied with a gamma model of rate heterogeneity plus invariant sites. 3 demographic models were investigated (constant, exponential, and Bayesian skyline), using an uncorrelated lognormal clock with the previously reported rate of evolution for *L. pneumophila* as a prior ( $1.39 \times 10^{-7}$ , 95% HPD intervals -  $5.41 \times 10^{-8} - 2.30 \times 10^{-7}$ ) [1]. For each demographic model, 3 independent chains were run for  $1 \times 10^8$  generations, with sampling every 10,000 generations and 10% discarded as burn-in, resulting in uncertain but overlapping estimates for the time of the most recent common ancestor between 83 to 142 days prior to the start of the outbreak (median).

| Demographic model  | Mean root height (d) | Median root height (d) | 95% HPDs |
|--------------------|----------------------|------------------------|----------|
| Constant           | 111                  | 90                     | 19-234   |
| Exponential growth | 94                   | 83                     | 22-192   |
| Bayesian skyline   | 177                  | 142                    | 25-404   |

HPD, highest posterior density

**Table S3** Nearest homologs for ORFs identified in the genomic island encoding the novel putative T4SS among Edinburgh outbreak *L. pneumophila*

| ORF no. | Best BLASTp hit from nr database                                                                                                        | evalue |
|---------|-----------------------------------------------------------------------------------------------------------------------------------------|--------|
| ORF 1   | ref YP_003619374.1  hypothetical protein lpa_03002 [ <i>Legionella pneumophila</i> 2300/99 Alcoy]                                       | 4e-27  |
| ORF 2   | ref YP_003619373.1  hypothetical protein lpa_03001 [ <i>Legionella pneumophila</i> 2300/99 Alcoy]                                       | 1e-67  |
| ORF 3   | ref YP_001250835.1  polyhydroxyalkanoic synthase [ <i>Legionella pneumophila</i> str. Corby]                                            | 0      |
| ORF 4   | ref WP_019973975.1  hypothetical protein [ <i>Empedobacter brevis</i> ]                                                                 | 5e-24  |
| ORF 5   | ref YP_001306333.1  putative transcriptional regulator [ <i>Thermosiphon melanesiensis</i> BI429]                                       | 5e-40  |
| ORF 6   | ref WP_006870720.1  hypothetical protein [ <i>Legionella drancourtii</i> ]                                                              | 2e-05  |
| ORF 7   | ref WP_006870721.1  methylase [ <i>Legionella drancourtii</i> ]                                                                         | 3e-123 |
| ORF 8   | ref WP_006870722.1  hypothetical protein [ <i>Legionella drancourtii</i> ]                                                              | 0      |
| ORF 9   | ref WP_006870723.1  transporter [ <i>Legionella drancourtii</i> ]                                                                       | 0      |
| ORF 10  | ref WP_006870724.1  hypothetical protein [ <i>Legionella drancourtii</i> ]                                                              | 4e-21  |
| ORF 11  | ref NP_622719.1  hypothetical protein TTE1077 [ <i>Thermoanaerobacter tengcongensis</i> MB4]                                            | 3e-93  |
| ORF 12  | ref WP_006870727.1  repressor [ <i>Legionella drancourtii</i> ]                                                                         | 1e-102 |
| ORF 13  | ref WP_006870728.1  hypothetical protein [ <i>Legionella drancourtii</i> ] (LvrA homolog)                                               | 1e-130 |
| ORF 14  | ref WP_003632832.1  legionella vir region protein LvrB2 [ <i>Legionella longbeachae</i> ] (LvrB homolog)                                | 3e-31  |
| ORF 15  | ref YP_005186425.1  hypothetical protein lp12_2077 [ <i>Legionella pneumophila</i> subsp. <i>pneumophila</i> ATCC 43290] (LvrC homolog) | 7e-21  |
| ORF 16  | ref WP_003632834.1  hypothetical protein [ <i>Legionella longbeachae</i> ] (PilL homolog)                                               | 6e-88  |
| ORF 17  | ref WP_003632835.1  hypothetical protein [ <i>Legionella longbeachae</i> ]                                                              | 9e-128 |
| ORF 18  | ref WP_003632836.1  hypothetical protein [ <i>Legionella longbeachae</i> ]                                                              | 0      |
| ORF 19  | ref WP_003632837.1  hypothetical protein [ <i>Legionella longbeachae</i> ]                                                              | 2e-97  |
| ORF 20  | ref WP_003632838.1  hypothetical protein [ <i>Legionella longbeachae</i> ]                                                              | 2e-109 |
| ORF 21  | ref WP_006870735.1  hypothetical protein [ <i>Legionella drancourtii</i> ]                                                              | 2e-57  |
| ORF 22  | ref WP_003632841.1  hypothetical protein [ <i>Legionella longbeachae</i> ]                                                              | 2e-51  |
| ORF 23  | ref WP_003632842.1  hypothetical protein [ <i>Legionella longbeachae</i> ]                                                              | 3e-85  |
| ORF 24  | ref WP_003632843.1  hypothetical protein [ <i>Legionella longbeachae</i> ]                                                              | 6e-79  |
| ORF 25  | ref WP_003632844.1  hypothetical protein [ <i>Legionella longbeachae</i> ]                                                              | 3e-147 |
| ORF 26  | ref WP_003632845.1  hypothetical protein [ <i>Legionella longbeachae</i> ]                                                              | 0      |
| ORF 27  | ref WP_003632846.1  membrane protein [ <i>Legionella longbeachae</i> ]                                                                  | 0      |
| ORF 28  | ref WP_003632847.1  hypothetical protein [ <i>Legionella longbeachae</i> ]                                                              | 2e-89  |
| ORF 29  | ref WP_003632848.1  type IV secretory protein VirB4 [ <i>Legionella longbeachae</i> ]                                                   | 0      |
| ORF 30  | ref WP_003632849.1  hypothetical protein [ <i>Legionella longbeachae</i> ]                                                              | 0      |

| ORF no. | Best BLASTp hit from nr database                                                                          | evaluate |
|---------|-----------------------------------------------------------------------------------------------------------|----------|
| ORF 31  | ref WP_003632850.1  pilus assembly protein PilT [Legionella longbeachae]                                  | 0        |
| ORF 32  | ref WP_003632852.1  membrane protein [Legionella longbeachae]                                             | 0        |
| ORF 33  | ref WP_003632853.1  hypothetical protein [Legionella longbeachae]                                         | 1e-38    |
| ORF 34  | ref WP_003632854.1  hypothetical protein [Legionella longbeachae]                                         | 4e-45    |
| ORF 35  | ref WP_003632855.1  conjugal transfer protein TraD [Legionella longbeachae]                               | 0        |
| ORF 36  | ref YP_007652706.1  Hypothetical protein XCAW_a00004 [Xanthomonas citri subsp. citri Aw12879]             | 2e-61    |
| ORF 37  | ref WP_003632859.1  integrase [Legionella longbeachae]                                                    | 0        |
| ORF 38  | ref WP_003632860.1  integrase [Legionella longbeachae]                                                    | 0        |
| ORF 39  | ref WP_019646951.1  capsid protein [Novispirillum itersonii]                                              | 0.1      |
| ORF 40  | ref WP_006869764.1  hypothetical protein [Legionella drancourtii]                                         | 5e-07    |
| ORF 41  | ref WP_006869765.1  antirestriction protein [Legionella drancourtii]                                      | 7e-90    |
| ORF 42  | ref YP_910577.1  DNA-cytosine methyltransferase [Chlorobium phaeobacteroides DSM 266]                     | 0        |
| ORF 43  | ref WP_017275581.1  DNA glycosylase [Sinorhizobium meliloti]                                              | 3e-56    |
| ORF 44  | ref YP_001950539.1  HNH endonuclease [Geobacter lovleyi SZ]                                               | 8e-77    |
| ORF 45  | ref YP_001950540.1  hypothetical protein Glov_0291 [Geobacter lovleyi SZ]                                 | 0        |
| ORF 46  | ref YP_001950541.1  hypothetical protein Glov_0292 [Geobacter lovleyi SZ]                                 | 5e-49    |
| ORF 47  | ref YP_001950542.1  non-specific serine/threonine protein kinase [Geobacter lovleyi SZ]                   | 0        |
| ORF 48  | ref YP_096070.1  prophage DLP12 integrase [Legionella pneumophila subsp. pneumophila str. Philadelphia 1] | 1e-170   |

1. Sanchez-Buso L, Comas I, Jorques G, Gonzalez-Candelas F: **Recombination drives genome evolution in outbreak-related Legionella pneumophila isolates.** *Nat Genet* 2014, **advance online publication.**
